# Supplementary material for: Disrupted alternative splicing for genes implicated in splicing and ciliogenesis causes PRPF31 retinitis pigmentosa
Source: PubMed Central journal article supplement (PMC6185938; doi:10.1038/s41467-018-06448-y), 2018-10-12
Supplement: 41467_2018_6448_MOESM2_ESM.pdf [file 41467_2018_6448_MOESM2_ESM.pdf]

## Description of Additional Supplementary Files

File Name: Supplementary Data 1

Description: Summary of clinical data for all RP11 patients and controls.

File Name: Supplementary Data 2

Description: Differential gene expression in fibroblasts, iPSCs, retinal organoids and RPE samples of all RP11 patients versus all WT controls ( $p_{adj} < 0.05$ ).

File Name: Supplementary Data 3

Description: Summary of GO terms for cellular components of genes differentially expressed in fibroblasts, iPSCs, retinal organoids and RPE samples of all RP11 patients versus all WT controls

File Name: Supplementary Data 4

Description: Differential exon usage in fibroblasts, iPSCs, retinal organoids and RPE samples of all RP11 patients versus all WT controls ( $p < 0.05$  and inclusion difference of  $>$  than 0.05).

File Name: Supplementary Data 5

Description: Summary of GO terms for cellular components of genes differentially spliced in fibroblasts, iPSCs, retinal organoids and RPE samples of all RP11 patients versus all WT controls

File Name: Supplementary Data 6

Description: A summary of sequencing data, antibodies, oligonucleotides, snRNP probes and CRISPR/Cas9 reagents.

File Name: Supplementary Data 7

Description: Off-target site sequencing analysis for gRNA (AGATCCAACCGTATGAGCTTCGG) of PCR products using corrected RP11-1VS patient genomic DNA.

File Name: Supplementary Data 8

Description: Differential protein abundance between RP11VS and Cas9-RP11VS corrected RPE cells and associated GO analysis.

File Name: Supplementary Data 9

Description: Differential protein abundance between RP11VS and Cas9-RP11VS corrected retinal organoids and associated GO analysis.
